# Supplementary material for: Conductive and SERS-active colloidal gold films spontaneously formed at a liquid/liquid interface
Source: Royal Society of Chemistry journal article supplement (doi:10.1039/c6ra03403a), 2016-01-01
Supplement: c6ra03403a1.pdf [file c6ra03403a1.pdf]

*Supporting Information*

**Conductive and SERS-active colloidal Au film  
spontaneously formed at a liquid/liquid interface**

*Xiuxiu Yin,<sup>a</sup> Yossef Peretz,<sup>a</sup> Pola G. Oppenheimer,<sup>b</sup> Leila Zeiri,<sup>c</sup> Alexandra  
Masarwa,<sup>a</sup> Natalya Froumin<sup>c</sup> and Raz Jelinek<sup>\*a,c</sup>*

*a Department of Chemistry, Ben Gurion University of the Negev, Beer Sheva 84105,  
Israel;*

*b School of Chemical Engineering, University of Birmingham, Edgbaston  
Birmingham B15 2TT, United Kingdom;*

*c Ilse Katz institute for Nanotechnology, Ben Gurion University of the Negev, Beer  
Sheva 84105, Israel.*

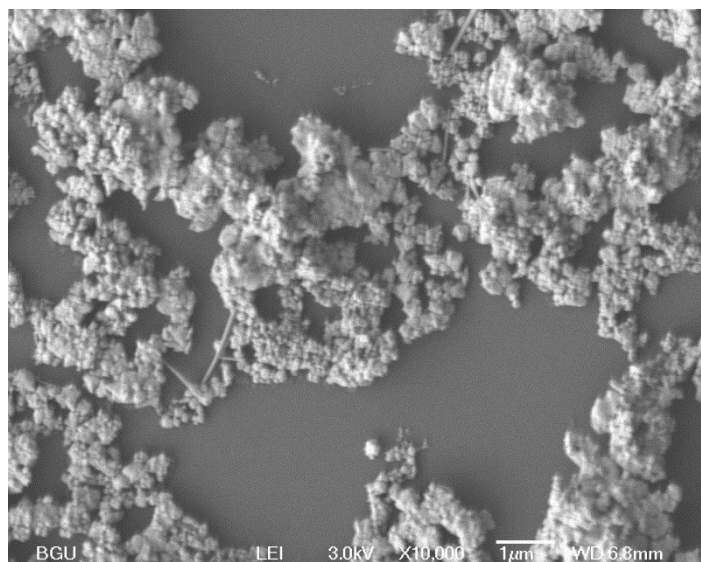

Figure S1. SEM image of gold film spontaneously assembled at the interface between hexane and water.

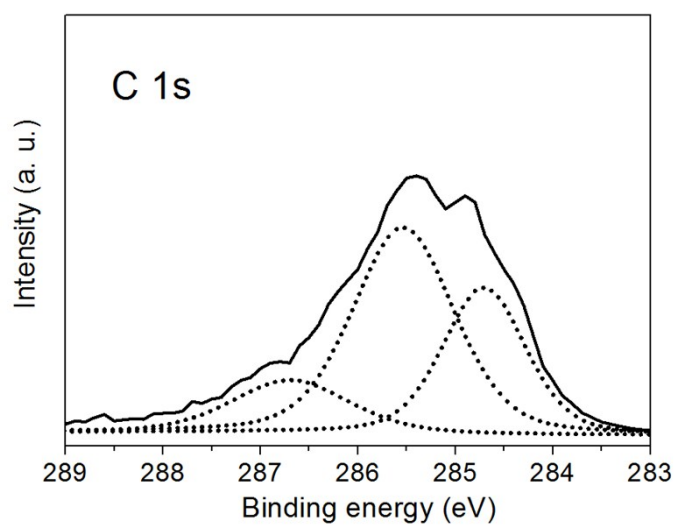

Figure S2. XPS spectrum of C 1s recorded after 24h incubation

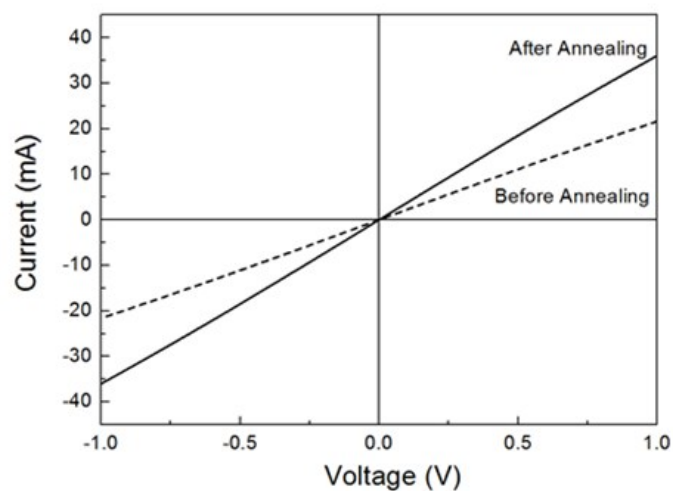

Figure S3. Electrical conductivity of the Au films after annealing. I–V curve recorded on 1 mm electrode spacing.

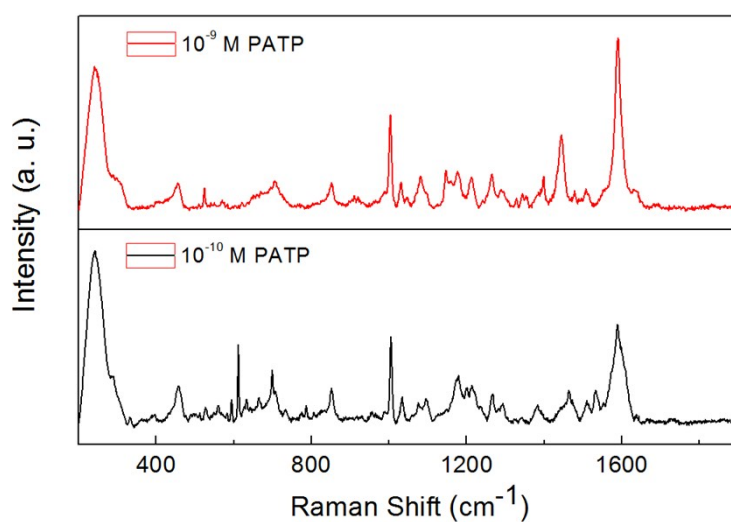

Figure S4. SERS of 10<sup>-9</sup> M and 10<sup>-10</sup> M solution of p-aminothiophenol placed over gold substrate and excited with a 633 nm radiation, revealing significant Raman signal enhancement in the order of 10<sup>8</sup> to 10<sup>9</sup> induced by the gold nanocrystal.
